# Supplementary material
Source: PubMed Central journal article supplement (PMC2799336)
Supplement: NIHMS156103-supplement-1_si_001.pdf [file NIHMS156103-supplement-1_si_001.pdf]

## Supporting Information

### **Yeast display evolution of a kinetically efficient 13-amino acid substrate for lipoic acid ligase**

*Sujiet Puthenveetil, Daniel S. Liu, Katharine A. White, Samuel Thompson,  
and Alice Y. Ting\**

Department of Chemistry, Massachusetts Institute of Technology, 77 Massachusetts  
Ave., Cambridge, Massachusetts 02139, USA.

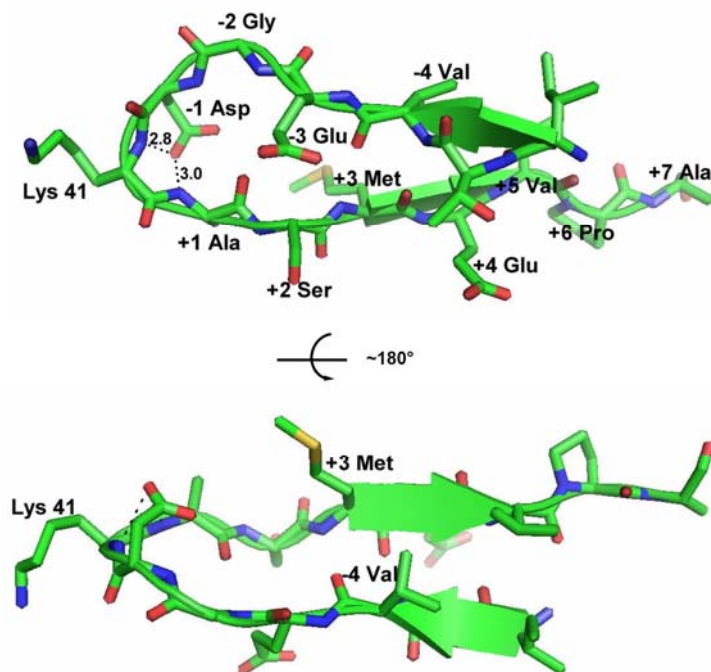

**Figure S1.** NMR structure of the E2p domain of *E. coli* pyruvate dehydrogenase (PDB 1QJO).<sup>1</sup>  $\beta$ -strands 4 and 5 are shown with the lipoylation site at Lys41. (Top) Hydrogen bonds between the sidechain of -1 Asp and the backbone NH groups of Lys41 and +1 Ala are indicated by dashed lines. (Bottom)  $\beta$ -strands 4 and 5 are shown in a different orientation. +3 Met and -4 Val sidechains point in the same direction. Based on this, we suggest that the sidechains of +3 Tyr and -4 Phe in our engineered LAP2 sequence may stack together.

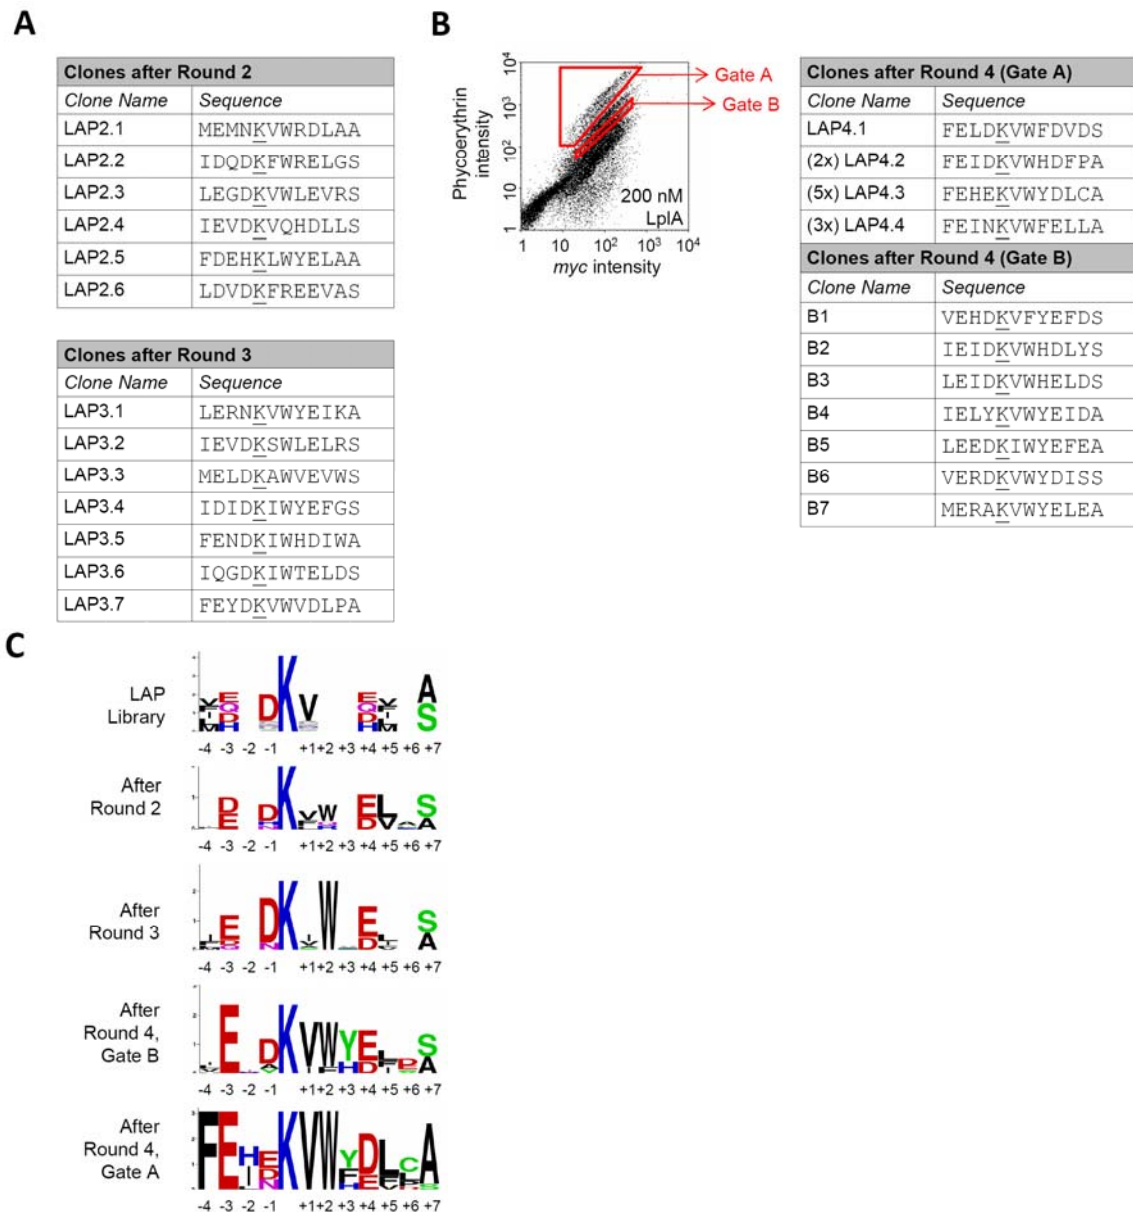

**Figure S2.** LAP sequences after each round of selection. **(A)** Sequences of LAP clones after rounds 2 and 3. Lipoylated lysine is underlined. **(B)** Comparison of clones obtained from two different sorting gates in round 4. Several clones from the higher gate (Gate A) appeared multiple times. **(C)** Diagrams illustrating amino acid frequencies at specific positions in the original library (based on library design), and after rounds 2-4 (based on sequences of isolated clones). Generated using <http://weblogo.berkeley.edu/>

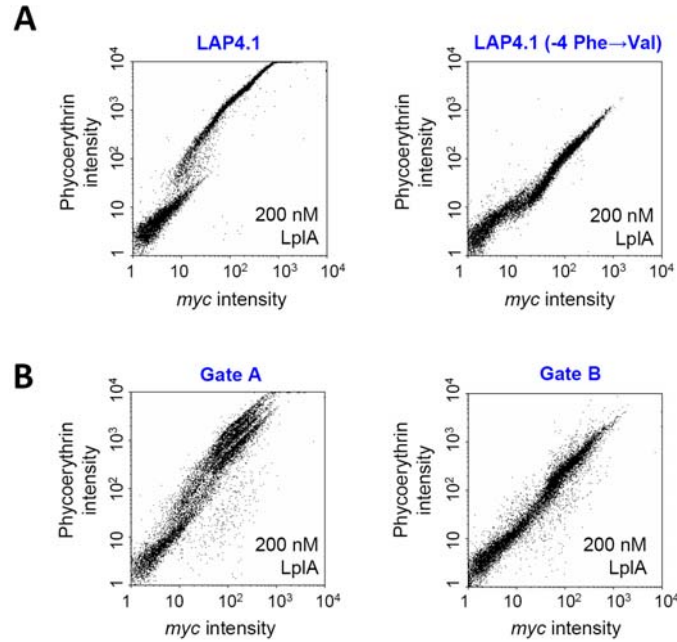

**Figure S3.** Contribution of -4 Phe to LAP recognition by LplA. (A) The -4 Phe→Val mutant of LAP4.1 was prepared, and compared to LAP4.1 in a yeast cell surface lipoylation assay with 200 nM LplA. (B) For comparison, the same assay was performed with Gate A and Gate B yeast pools, obtained from the fourth round of selection.

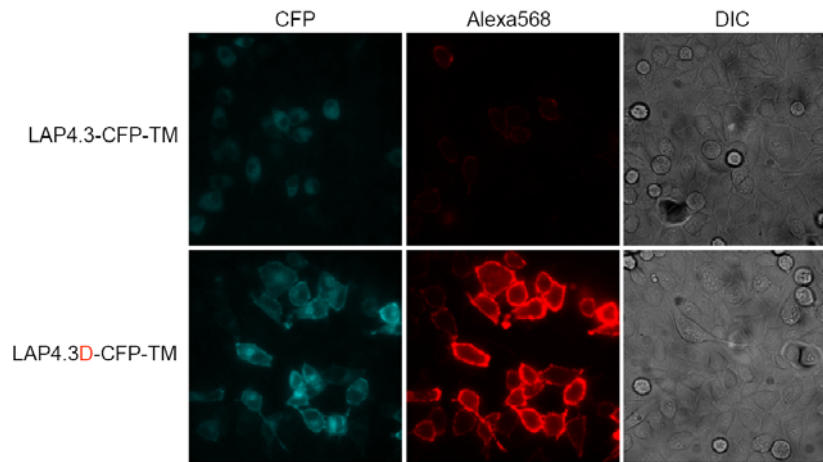

**Figure S4.** Cell surface lipoylation of LAP4.3 vs. LAP4.3D. HeLa cells expressing either LAP4.3-CFP-TM or LAP4.3D-CFP-TM were lipoylated with 1  $\mu$ M LplA for 10 minutes. Lipoylation was detected with Alexa568-conjugated anti-lipoic acid antibody.

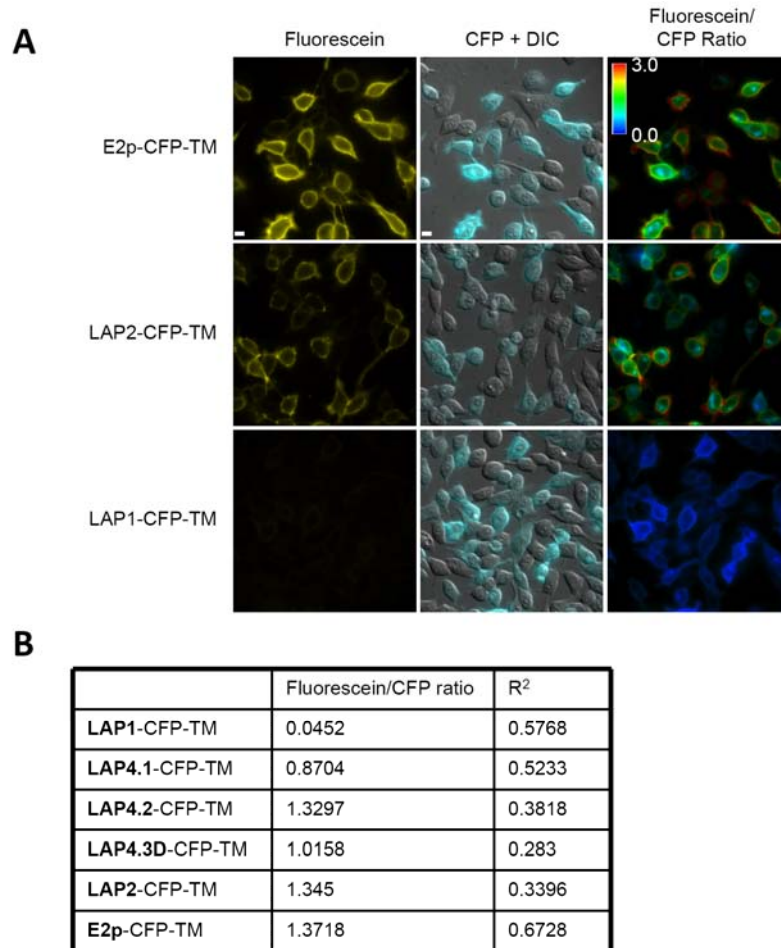

**Figure S5.** Cell surface lipoylation of LAP sequences and E2p. **(A)** HEK cells expressing CFP-TM fusions to E2p, LAP2, or LAP1 were labeled with 1  $\mu$ M LplA for 10 minutes, before staining with anti-lipoic acid antibody followed by fluorescein-conjugated secondary antibody.<sup>2</sup> The right column shows fluorescein/CFP ratio images, reflecting lipoylation efficiency. Red indicates a fluorescein/CFP intensity ratio of  $\sim$ 3.0 or greater. Scale bar, 10  $\mu$ m. **(B)** HEK cells expressing CFP-TM fusions to various LAP sequences or E2p were labeled and imaged as in (A). Single cell mean fluorescein/CFP intensity ratios were tabulated for >160 cells from >18 fields of view. These ratios were plotted, and the slopes and R<sup>2</sup> values are shown in the table.

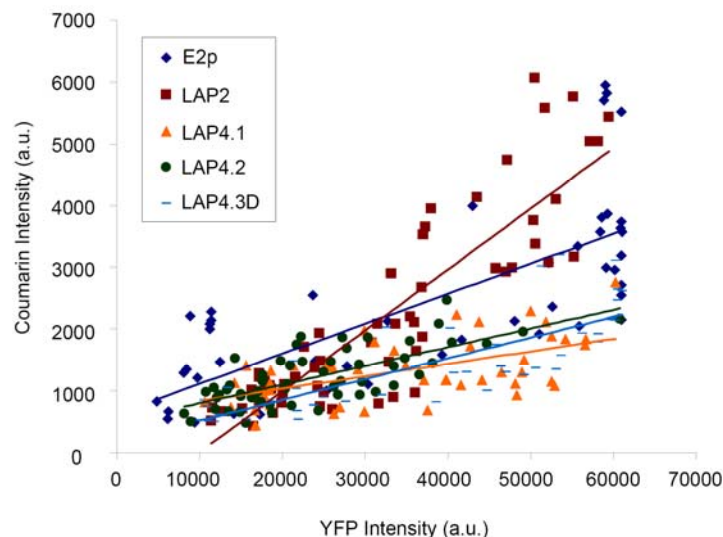

**Figure S6. Comparison of LAP sequences for intracellular protein labeling with a coumarin fluorophore ligase.**<sup>3</sup> LAP sequences or E2p were fused to Yellow Fluorescent Protein (YFP) and expressed in the nuclei of HEK293T cells. The fusion proteins were labeled for 10 minutes with 7-hydroxycoumarin using an engineered coumarin fluorophore ligase.<sup>3</sup> To evaluate labeling efficiency, the mean coumarin intensity was plotted against the mean YFP intensity, for single cells. A high coumarin/YFP ratio signifies high labeling yield. We note that LAP2-YFP expression levels were comparable to E2p-YFP expression levels in this assay.

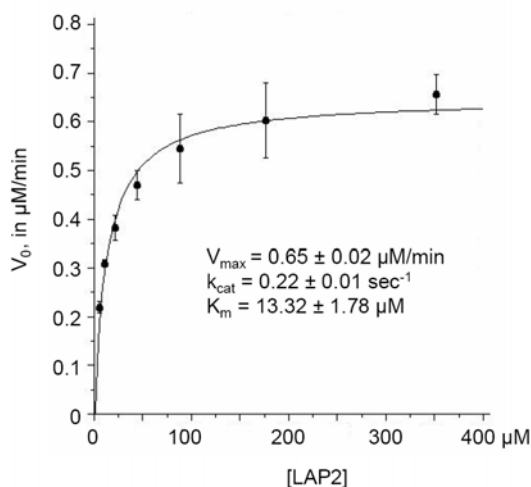

**Figure S7. LAP2 kinetics.** Various concentrations of synthetic LAP2 peptide (not a fusion protein) were lipoylated with 50 nM LplA, 750  $\mu$ M lipoic acid, and 3 mM ATP, and initial reaction rates were measured by HPLC. The Michaelis-Menten curve shows the initial rates plotted as a function of LAP2 concentration. Measurements were performed in triplicate. Error bars,  $\pm 1$  s.d.

| Peptide | Forward oligos                                        |
|---------|-------------------------------------------------------|
| LAP4.1  | 5'CTAGCGGATTTGAACTTGATAAAGTATGGTTTGATGTCGATTAC        |
| LAP4.2  | 5'CTAGCGGATTTCGAGATTGATAAAGTATGGCATGATTTCCCTGCAC      |
| LAP4.3D | 5'CTAGCGGATTTGAGCATGAGAAAGTTTGGTATGATCTCGATGCGC       |
| LAP2    | 5'CTAGCGGCTTCGAGATCGACAAGGTGTGGTACGACCTGGACGCCC       |
| LAP2-C  | 5' CTAGCGGCTTCGAGATCGACAAGGTGTGGTACGACCTGGACGCCTAAGAG |

  

| Peptide | Reverse oligos                                      |
|---------|-----------------------------------------------------|
| LAP4.1  | 5'AATTGTGAATCGACATCAAACCATACTTTATCAAGTTCAAATCCG     |
| LAP4.2  | 5'AATTGTGCAGGGAAATCATGCCATACTTTATCAATCTCGAATCCG     |
| LAP4.3D | 5'AATTGCGCATCGAGATCATACCAAACCTTCTCATGCTCAAATCCG     |
| LAP2    | 5'AATTGGGCGTCCAGGTCGTACCACACCTTGTGATCTCGAAGCCG      |
| LAP2-C  | 5'GATCCTCTTAGGCGTCCAGGTCGTACCACACCTTGTGATCTCGAAGCCG |

**Table S1.** Forward and reverse primers used in cloning LAP-HP1 fusion proteins.

Complete author list for Reference 30

- (30) Los, G. V.; Encell, L. P.; McDougall, M. G.; Hartzell, D. D.; Karassina, N.; Zimprich, C.; Wood, M. G.; Learish, R.; Ohana, R. F.; Urh, M.; Simpson, D.; Mendez, J.; Zimmerman, K.; Otto, P.; Vidugiris, G.; Zhu, J.; Darzins, A.; Klaubert, D. H.; Bulleit, R. F.; Wood, K. V. *ACS Chem. Biol.* **2008**, *3*, 373-382.

#### Reference List

- (1) Jones, D. D.; Stott, K. M.; Howard, M. J.; Perham, R. N. *Biochemistry* **2000**, *39*, 8448-8459.
- (2) We note that the surface expression levels of TM fusions to LAP peptides are ~2-fold lower than TM-fused E2p. However, expression levels of intracellular proteins are similar, whether fused to a LAP sequence or E2p.
- (3) Baruah, H., Uttamapinant, C., White, K. A., Fernández-Suárez, M., Puthenveetil, S., Thompson, S., and Ting, A. Y. Ref Type: Unpublished
